# Supplementary material
Source: publisher figshare collection journal article supplement (https://frontiersin.figshare.com/ndownloader/files/24679511)
Supplement: Supplementary file [file 24679511]

## **Supporting Information**

### **Constructing Cu<sub>7</sub>S<sub>4</sub>@SiO<sub>2</sub>/DOX multifunctional nanoplatfoms for synergistic photothermal-chemo therapy on melanoma tumors**

Leilei Zhang,<sup>1, 2</sup> Hui Pan,<sup>1, 2</sup> Yongyun Li,<sup>1, 2</sup> Fang Li,<sup>1, 2</sup> Xiaolin Huang<sup>1, 2\*</sup>

<sup>1</sup> Department of Ophthalmology, Ninth People's Hospital, Shanghai JiaoTong University School of Medicine, Shanghai 200011, China

<sup>2</sup> Shanghai Key Laboratory of Orbital Diseases and Ocular Oncology, Shanghai 200011, China.

\*Correspondence:

Xiaolin Huang, Email: drmaureenhuang@163.com.

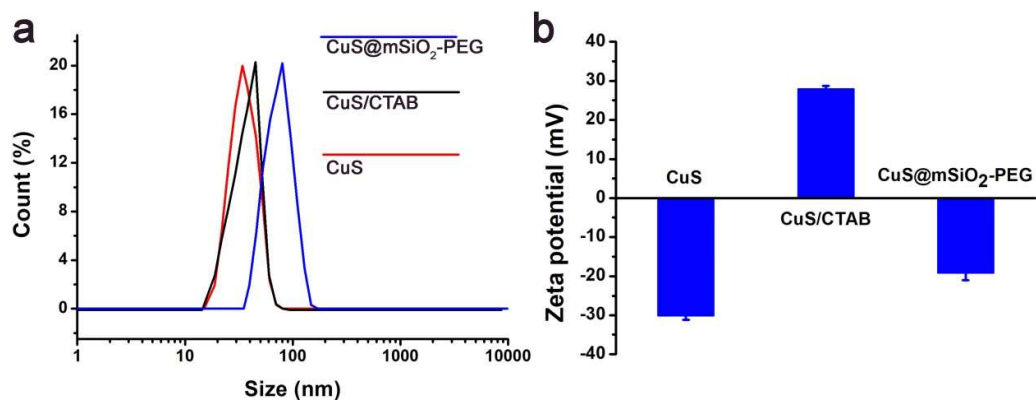

**Figure S1.** The size (a) and zeta potential (b) of CuS, CuS/CTAB and CuS@mSiO<sub>2</sub>-PEG nanoparticles.

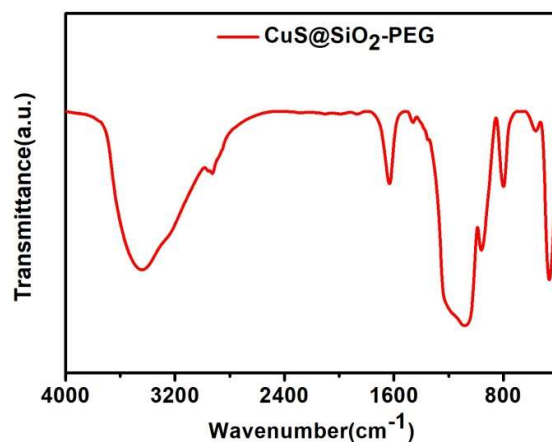

Figure S2. FTIR spectra of CuS@SiO<sub>2</sub>-PEG.

The sample shows a broad band at 3432 cm<sup>-1</sup> due to OH stretching; the band at 2931 cm<sup>-1</sup> are corresponding to CH<sub>2</sub> symmetric stretching, respectively; the band at 1635 cm<sup>-1</sup> are assigned to C=O symmetric stretching; the band at 1471 cm<sup>-1</sup> corresponds to CH<sub>2</sub> scissoring vibrations; In addition, the band at 1082 cm<sup>-1</sup> is contributed to C-O stretching vibration coordinating to metal cations. These results indicated that the surface polymer coated on CuS@SiO<sub>2</sub> was PEG.

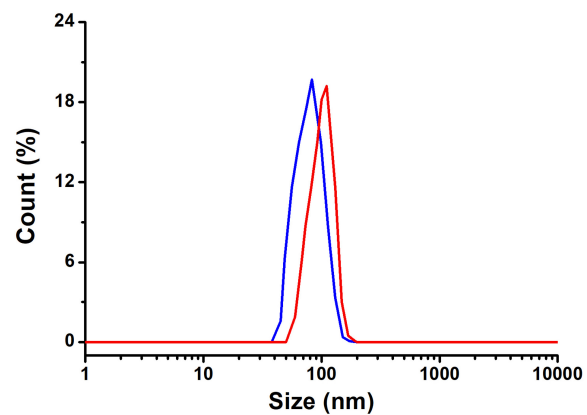

**Figure S3.** Dynamic light scattering (DLS) data of as-prepared (blue line) and stored (in water for 7 days)  $\text{Cu}_7\text{S}_4@\text{SiO}_2$  core-shell nanoparticles.

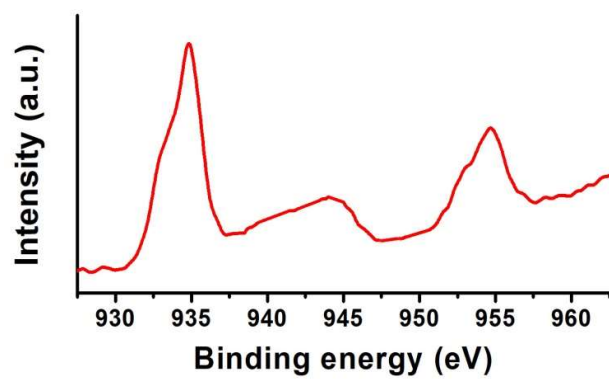

**Figure S4.** XPS spectra of Cu 2p in the Cu<sub>7</sub>S<sub>4</sub>@SiO<sub>2</sub> nanoparticles.

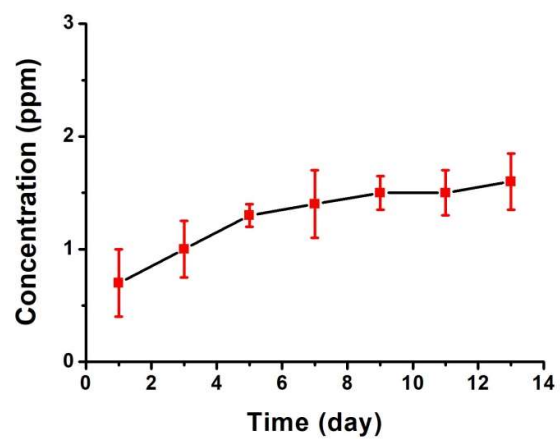

**Figure S5.** The  $\text{Cu}^{2+}$  release of  $\text{Cu}_7\text{S}_4@\text{SiO}_2$  nanoparticles (2 mg/mL) in PBS.

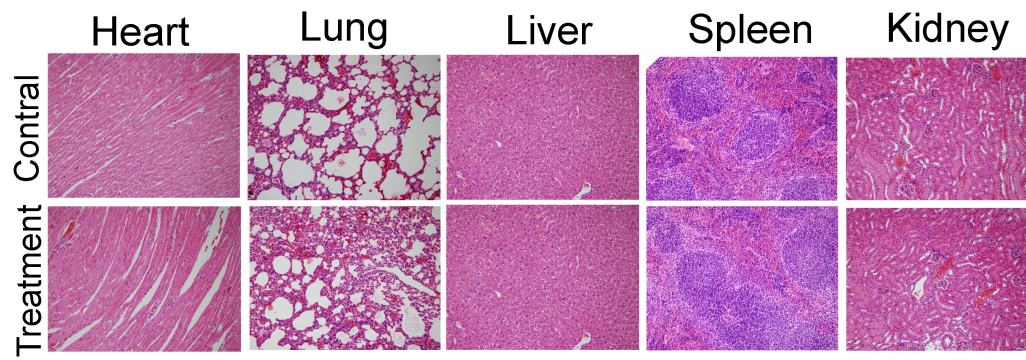

**Figure S6.** H&E stained slices of main organs. Magnification: 200 times.
